# Supplementary material for: Thiazolium-catalyzed intermolecular Stetter reaction of linear and cyclic alkyl α-diketones
Source: Royal Society of Chemistry journal article supplement (doi:10.1039/c1ob06480k), 2011-01-01

## **Thiazolium-Catalyzed Intermolecular Stetter Reaction of linear and cyclic alkyl $\alpha$ -diketones**

Olga Bortolini, Giancarlo Fantin, Marco Fogagnolo, Pier Paolo Giovannini, Alessandro Massi,\* and  
Salvatore Pacifico

*Dipartimento di Chimica, Laboratorio di Chimica Organica, Università di Ferrara, Via L. Borsari  
46, I-44121 Ferrara (Italy)*

[msslsn@unife.it](mailto:msslsn@unife.it)

### **Electronic supplementary information**

Table of content:

<sup>1</sup>H and <sup>13</sup>C NMR of new compounds **7d**, **9b**, **9h**, **11a**, **11b**, **11h**, **12**, and **14**

S2

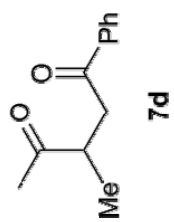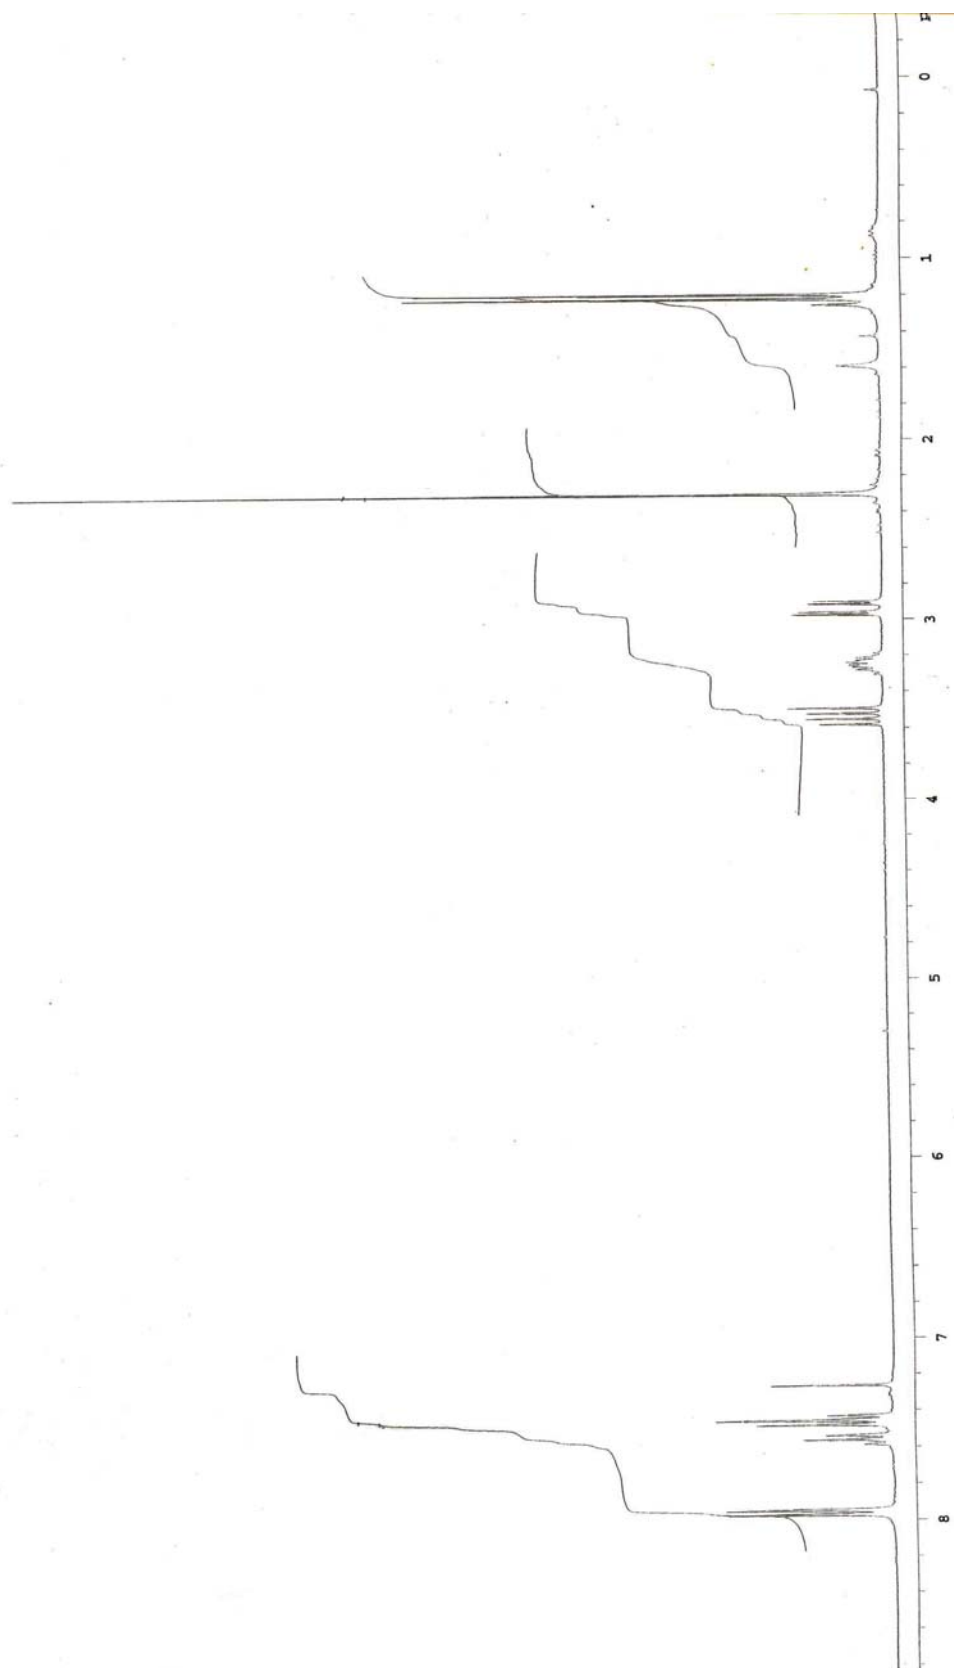

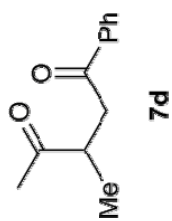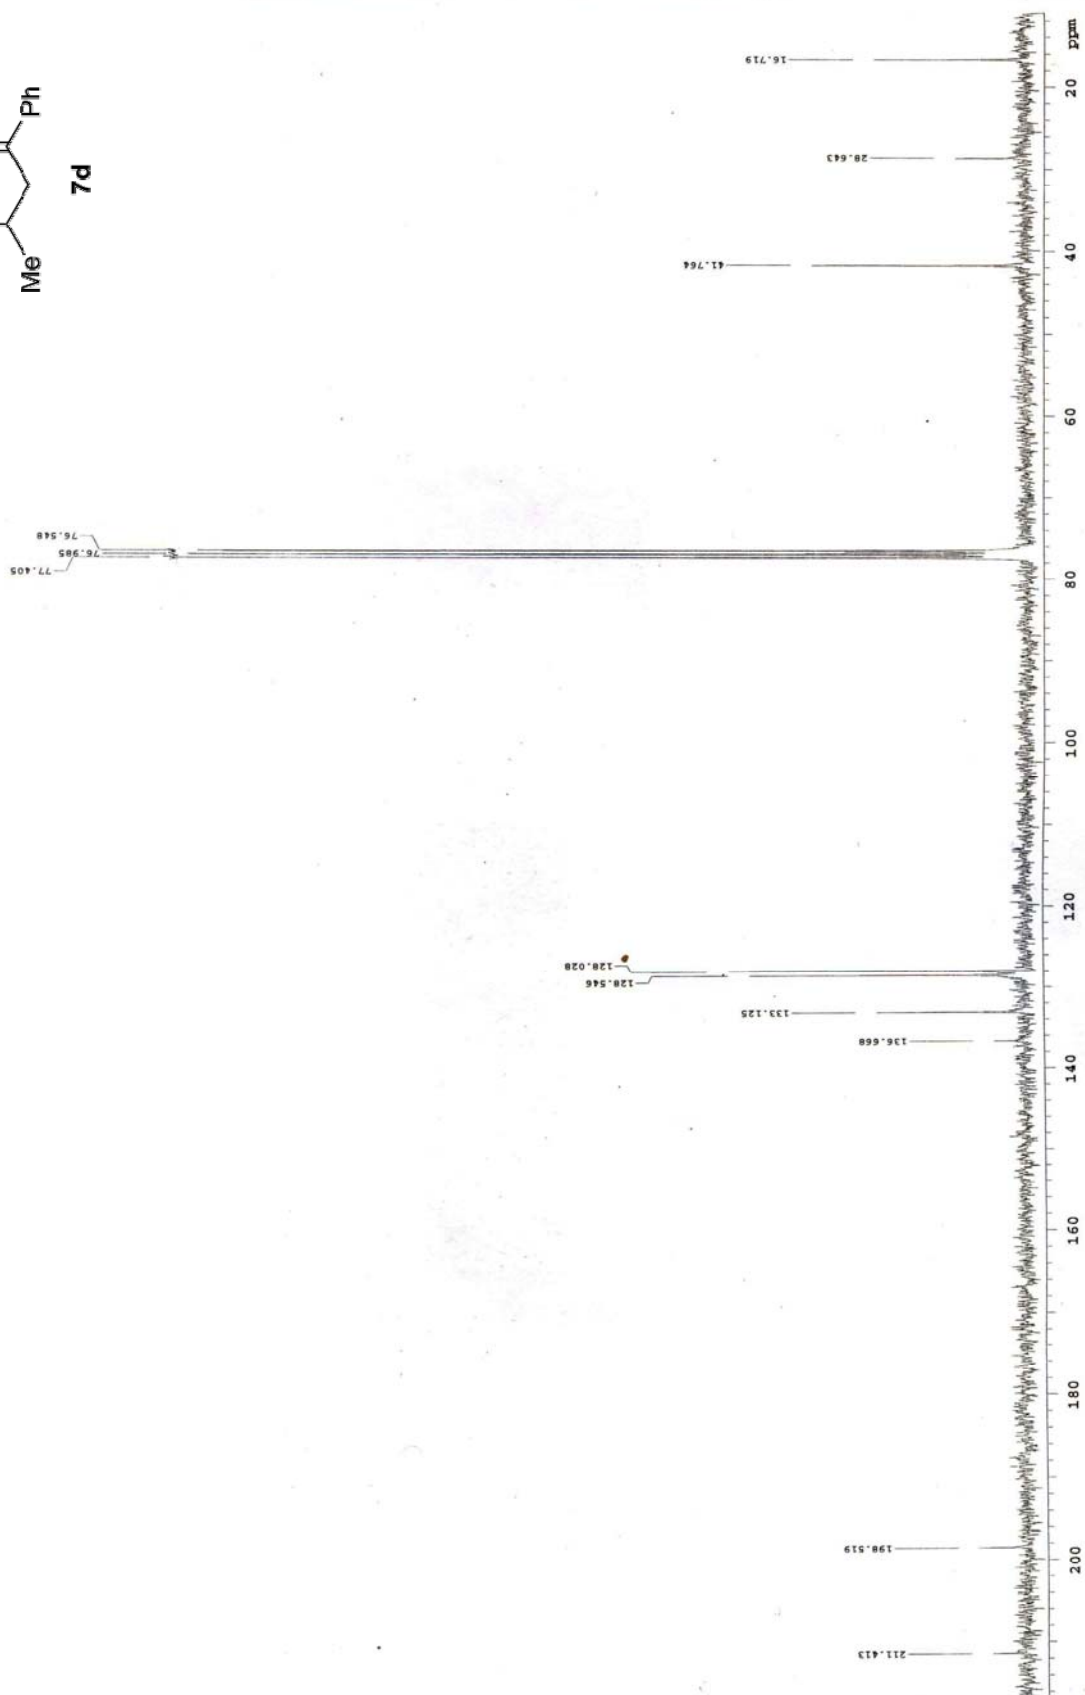

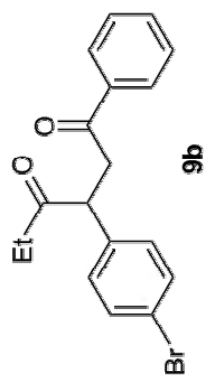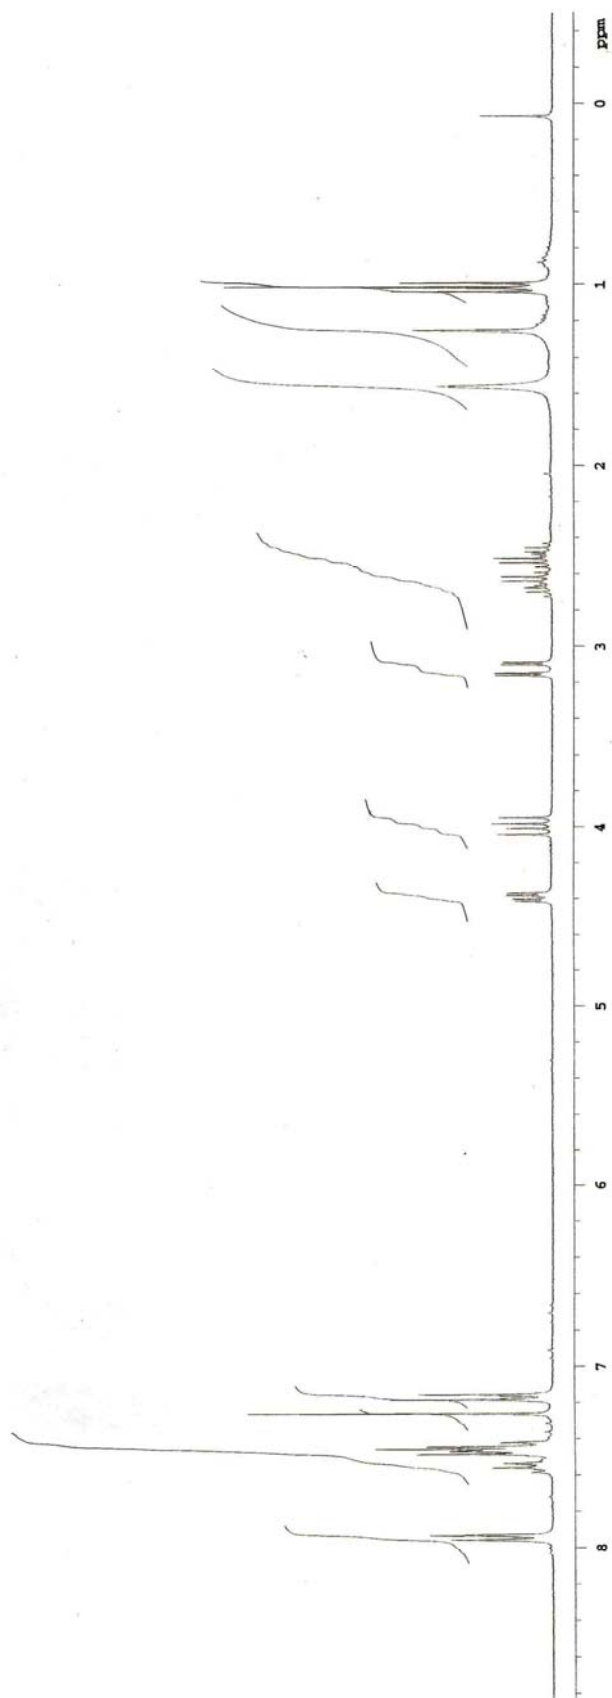

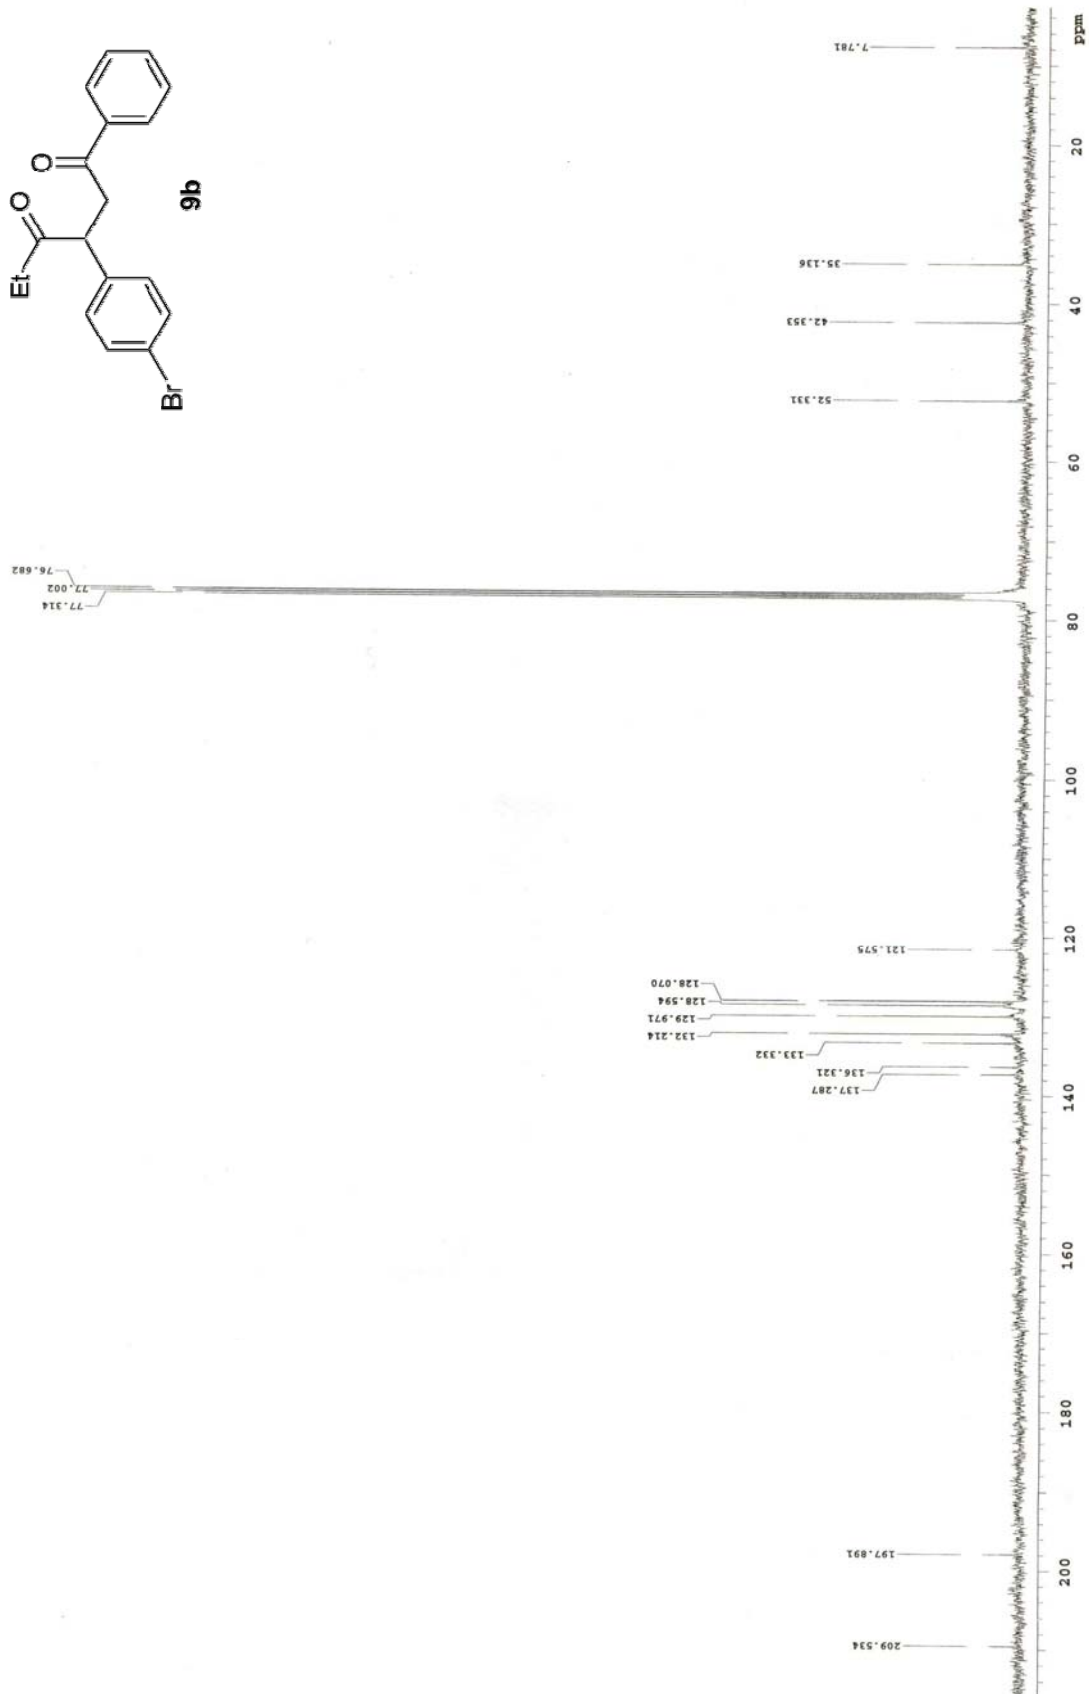

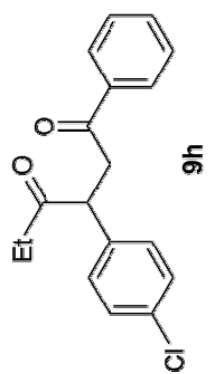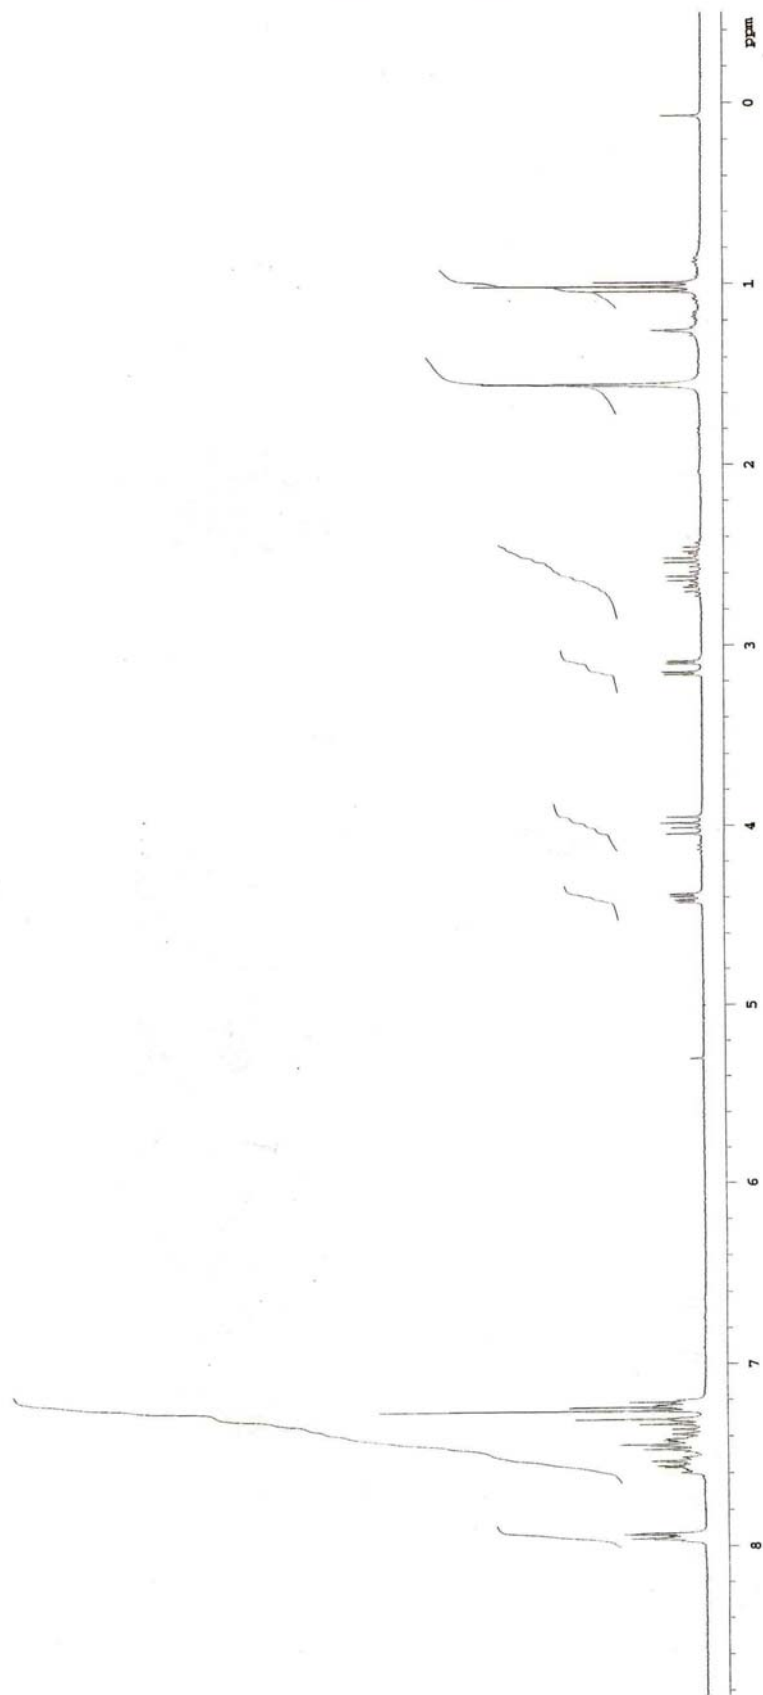

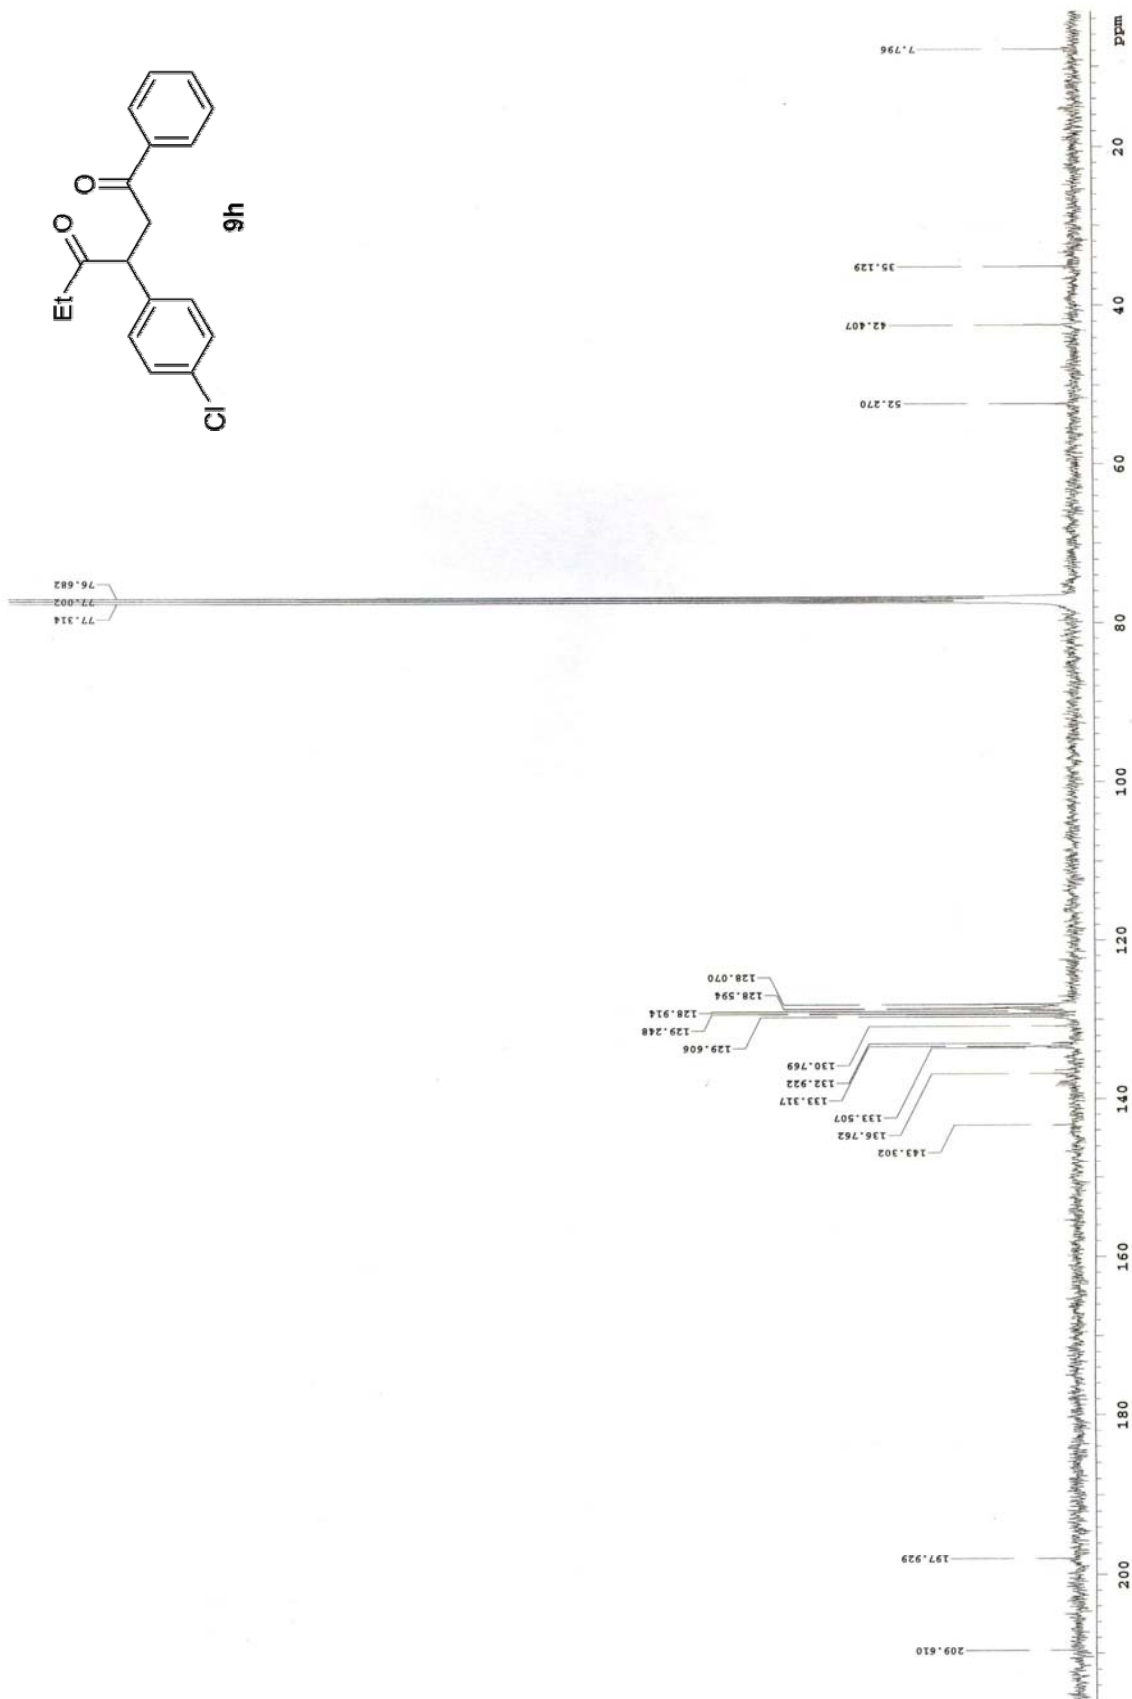

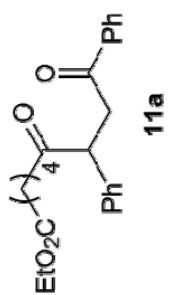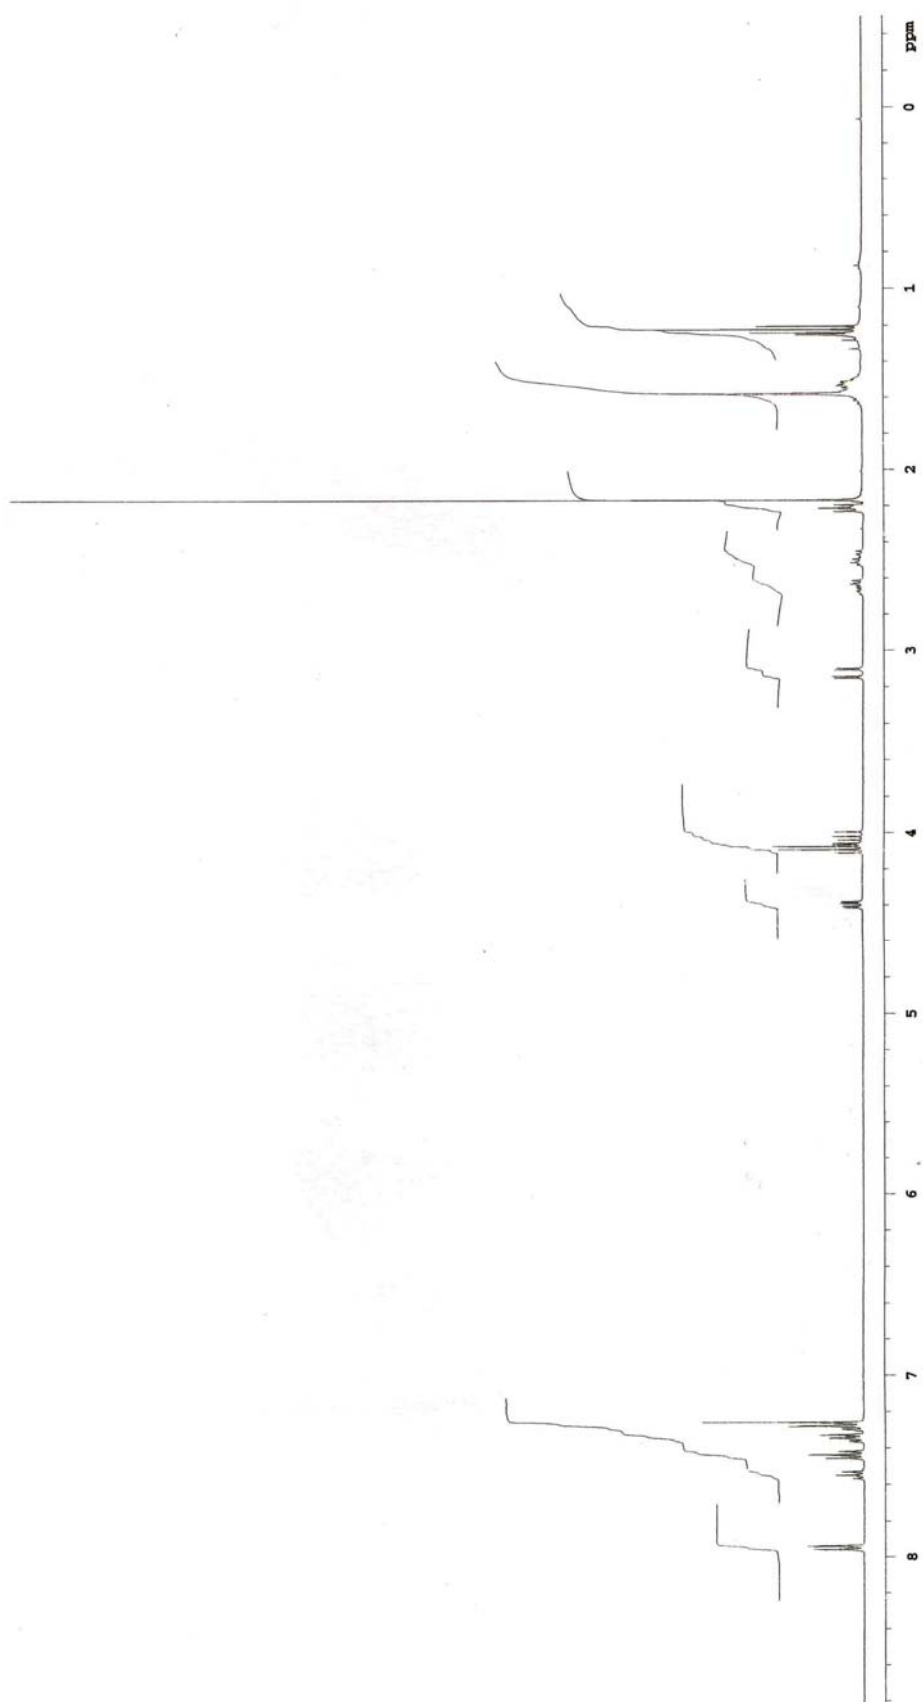



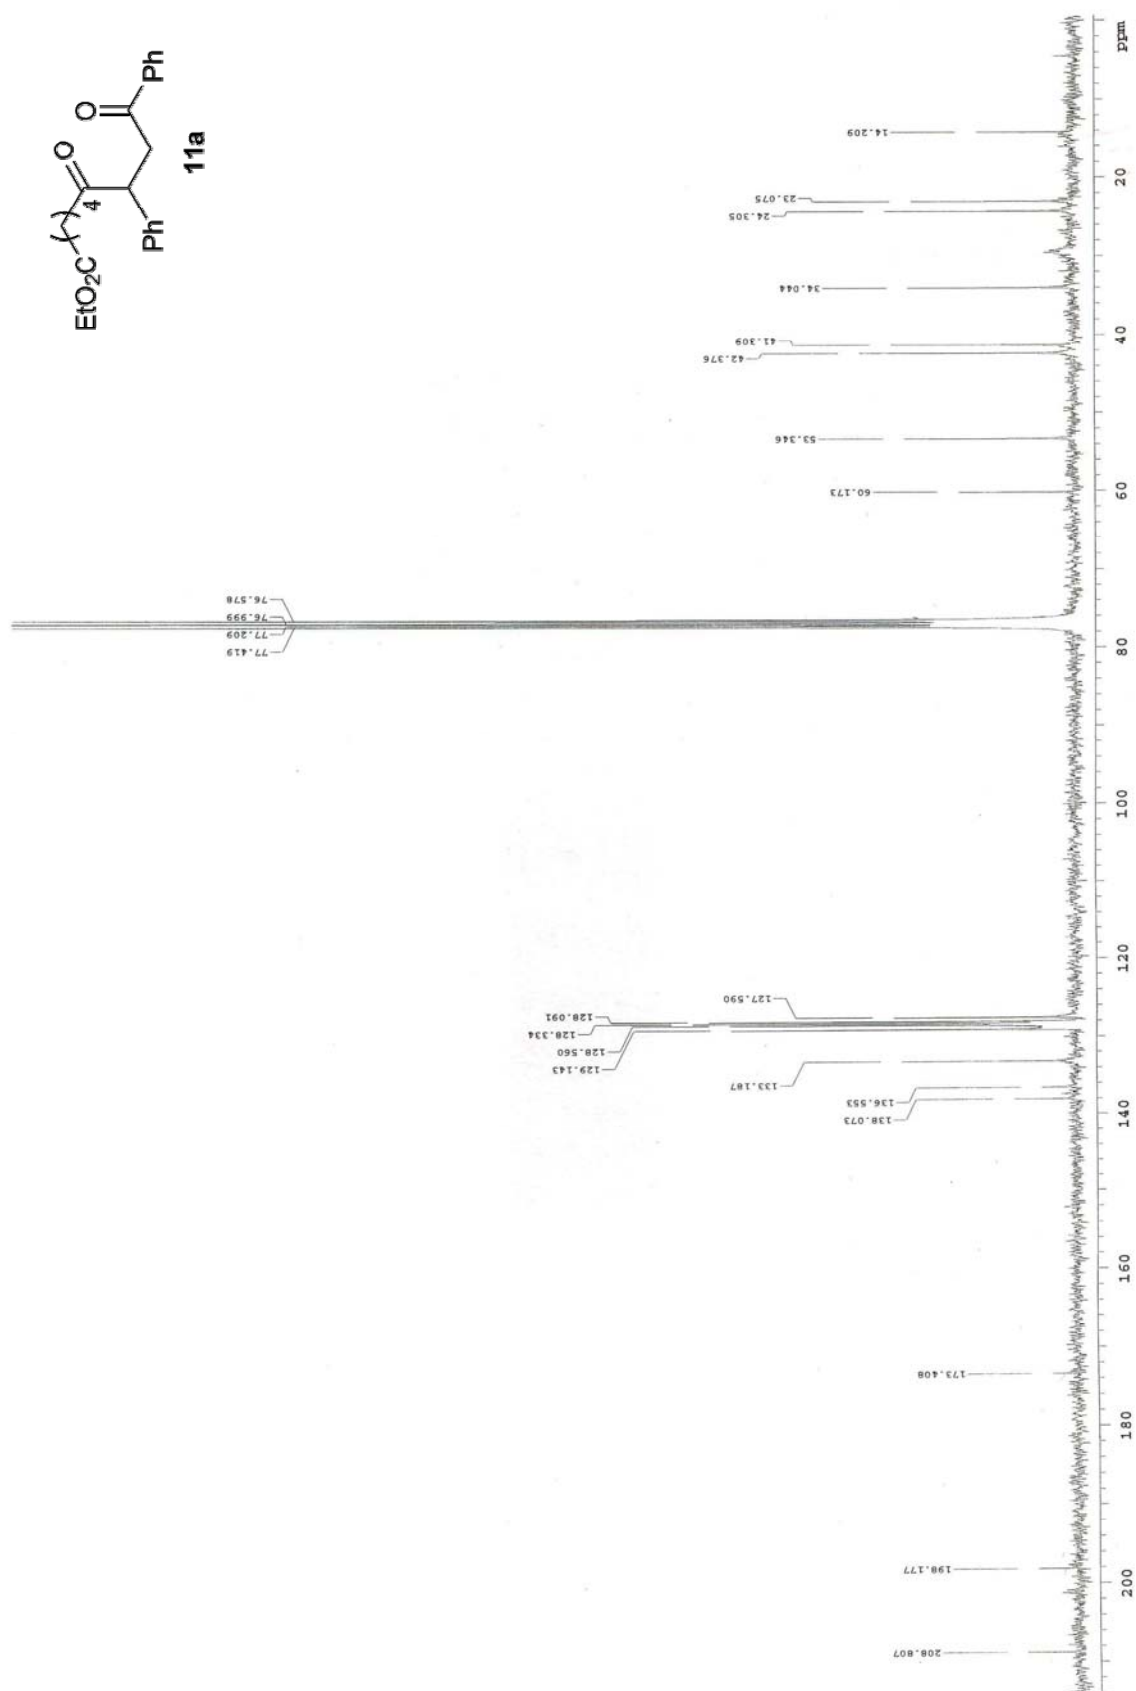

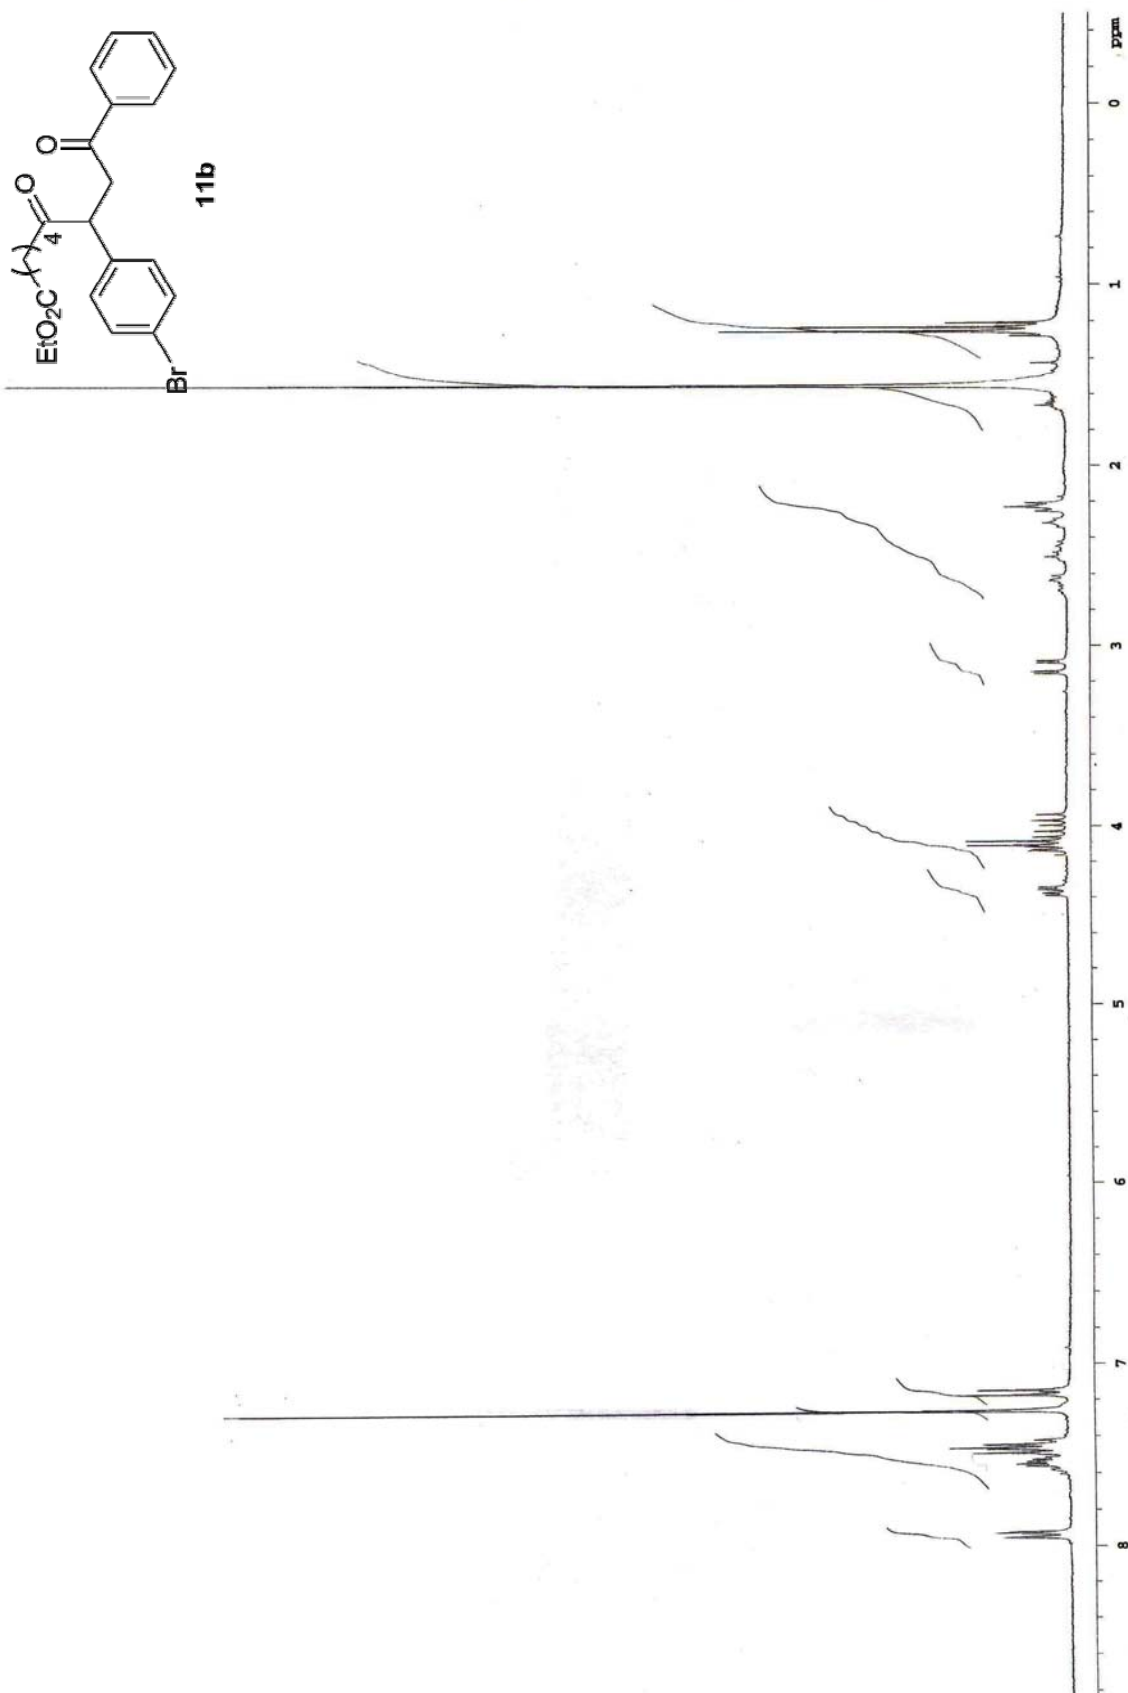

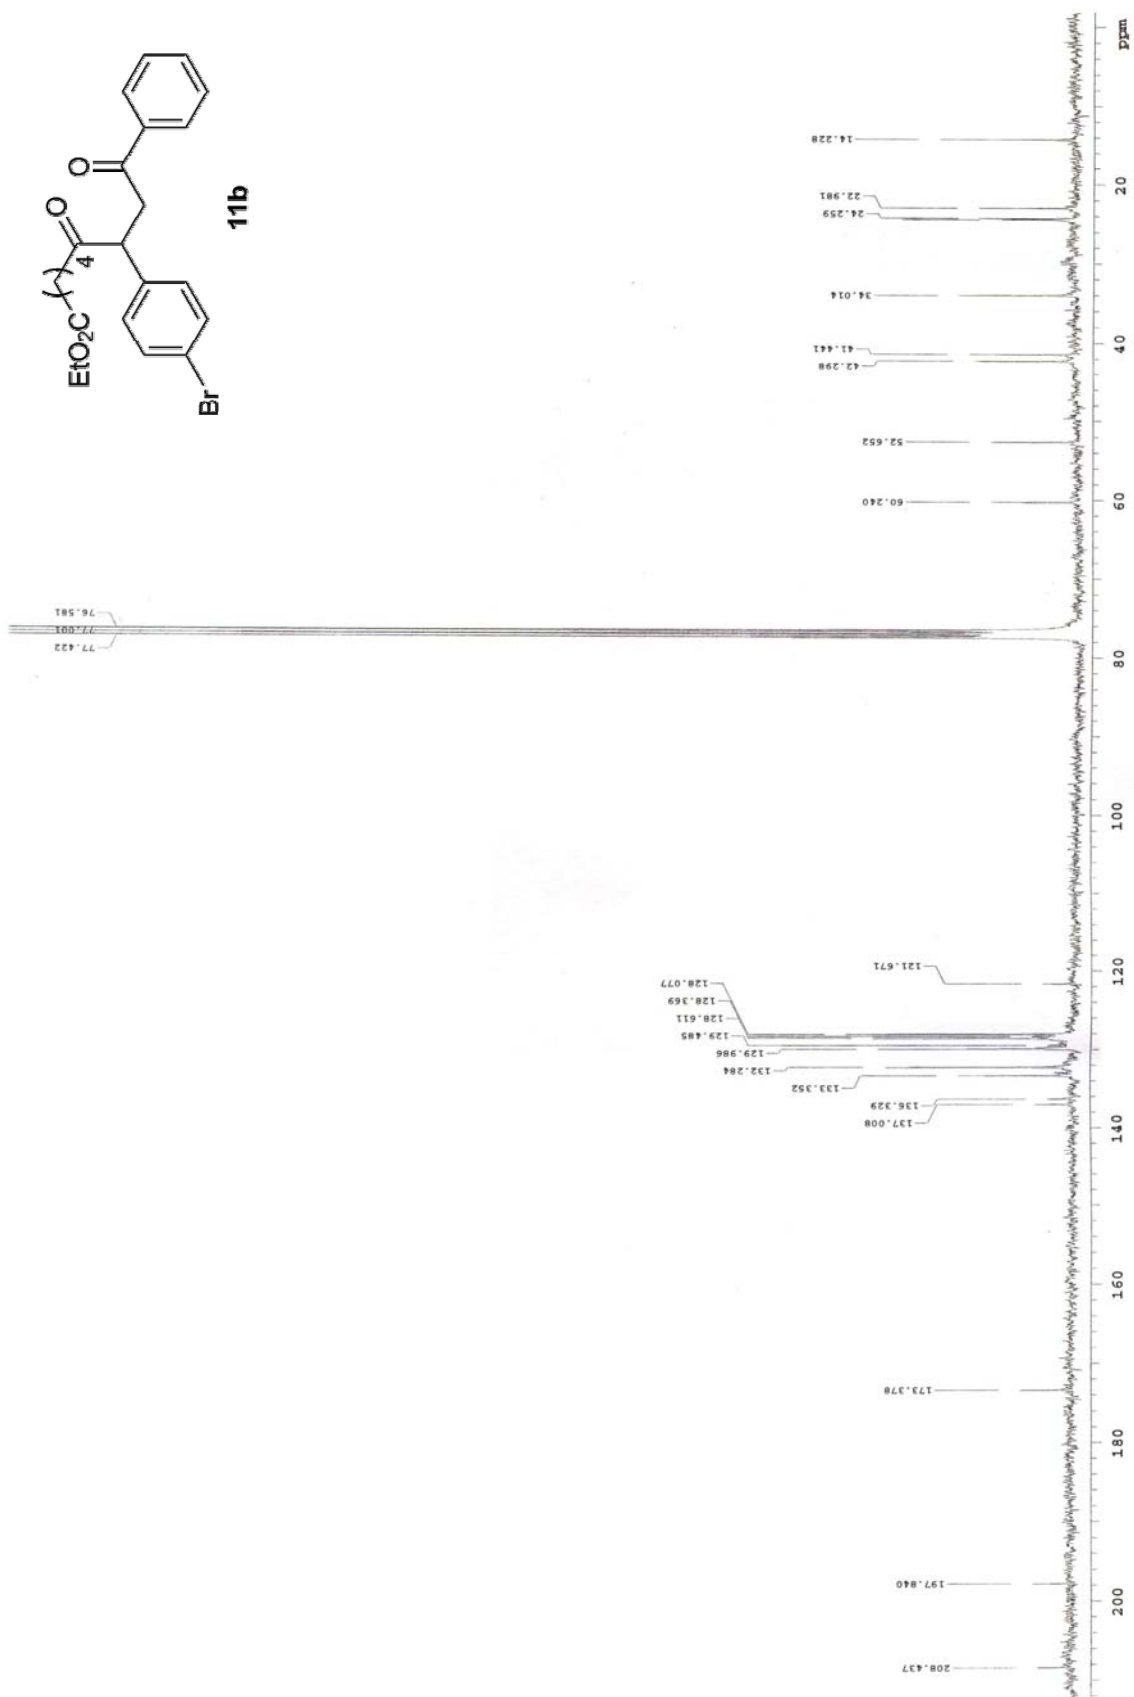

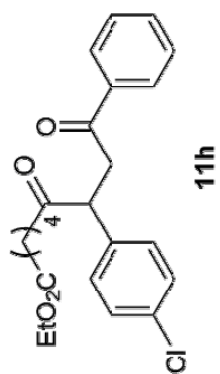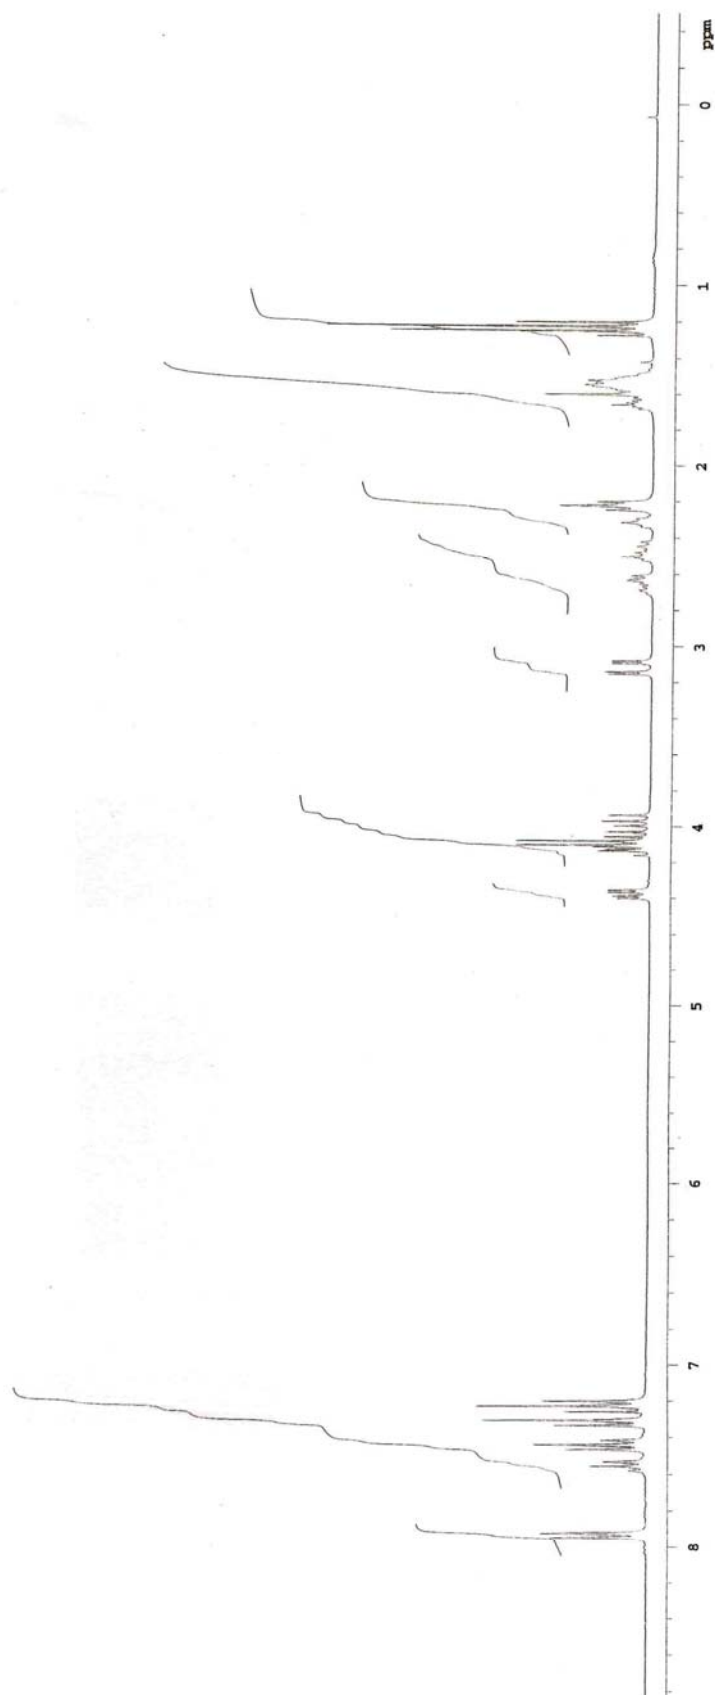

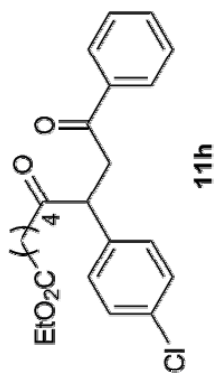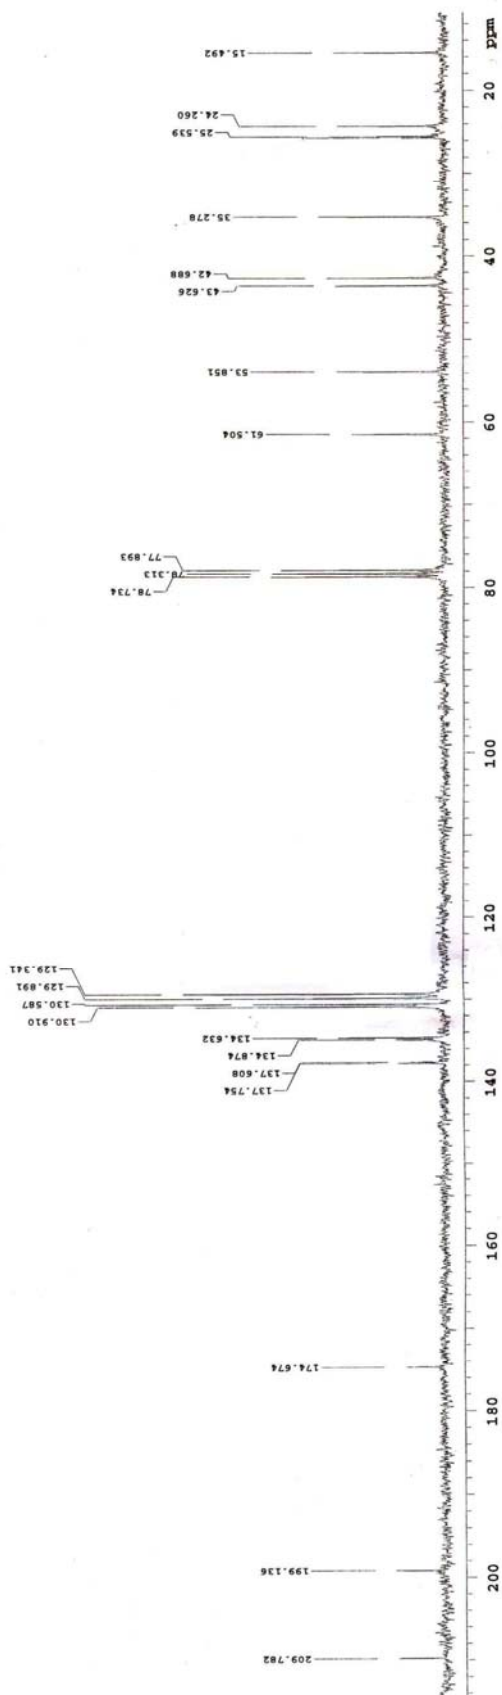

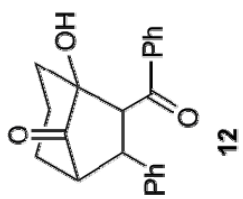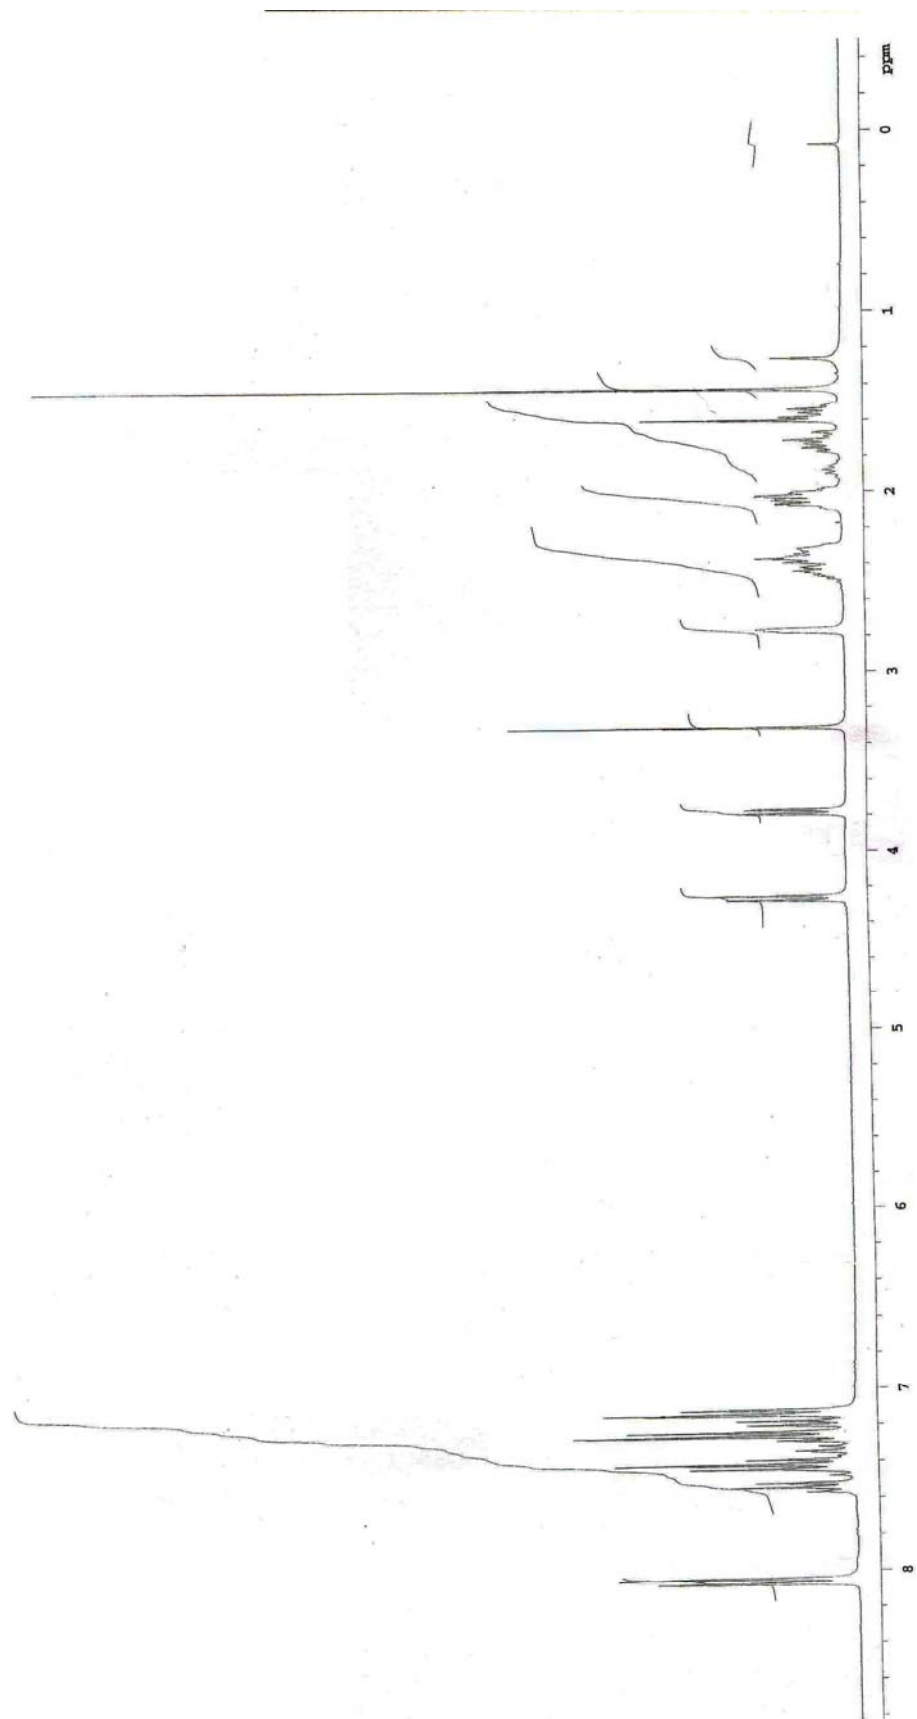

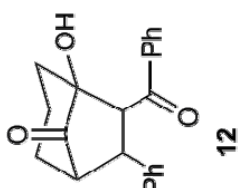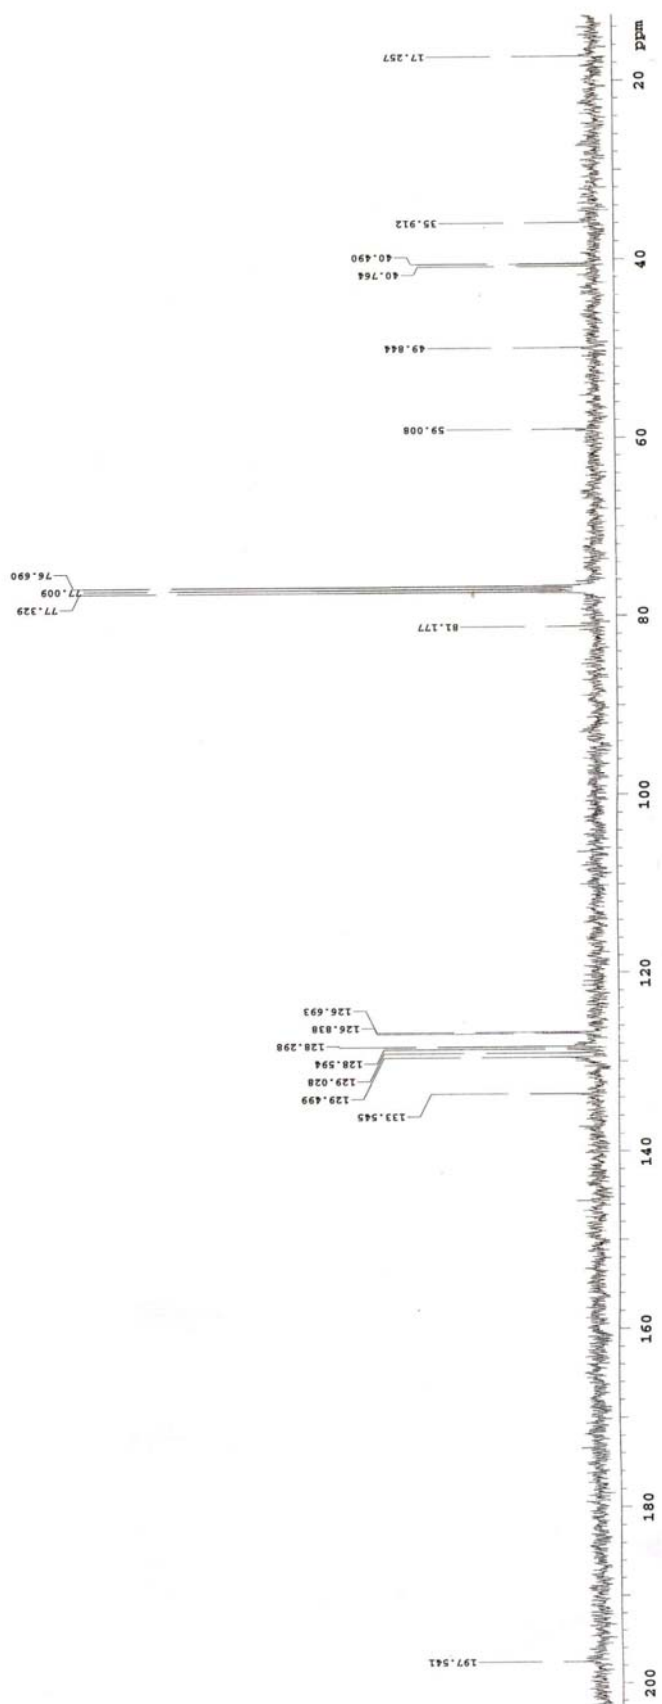

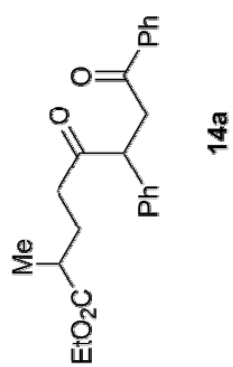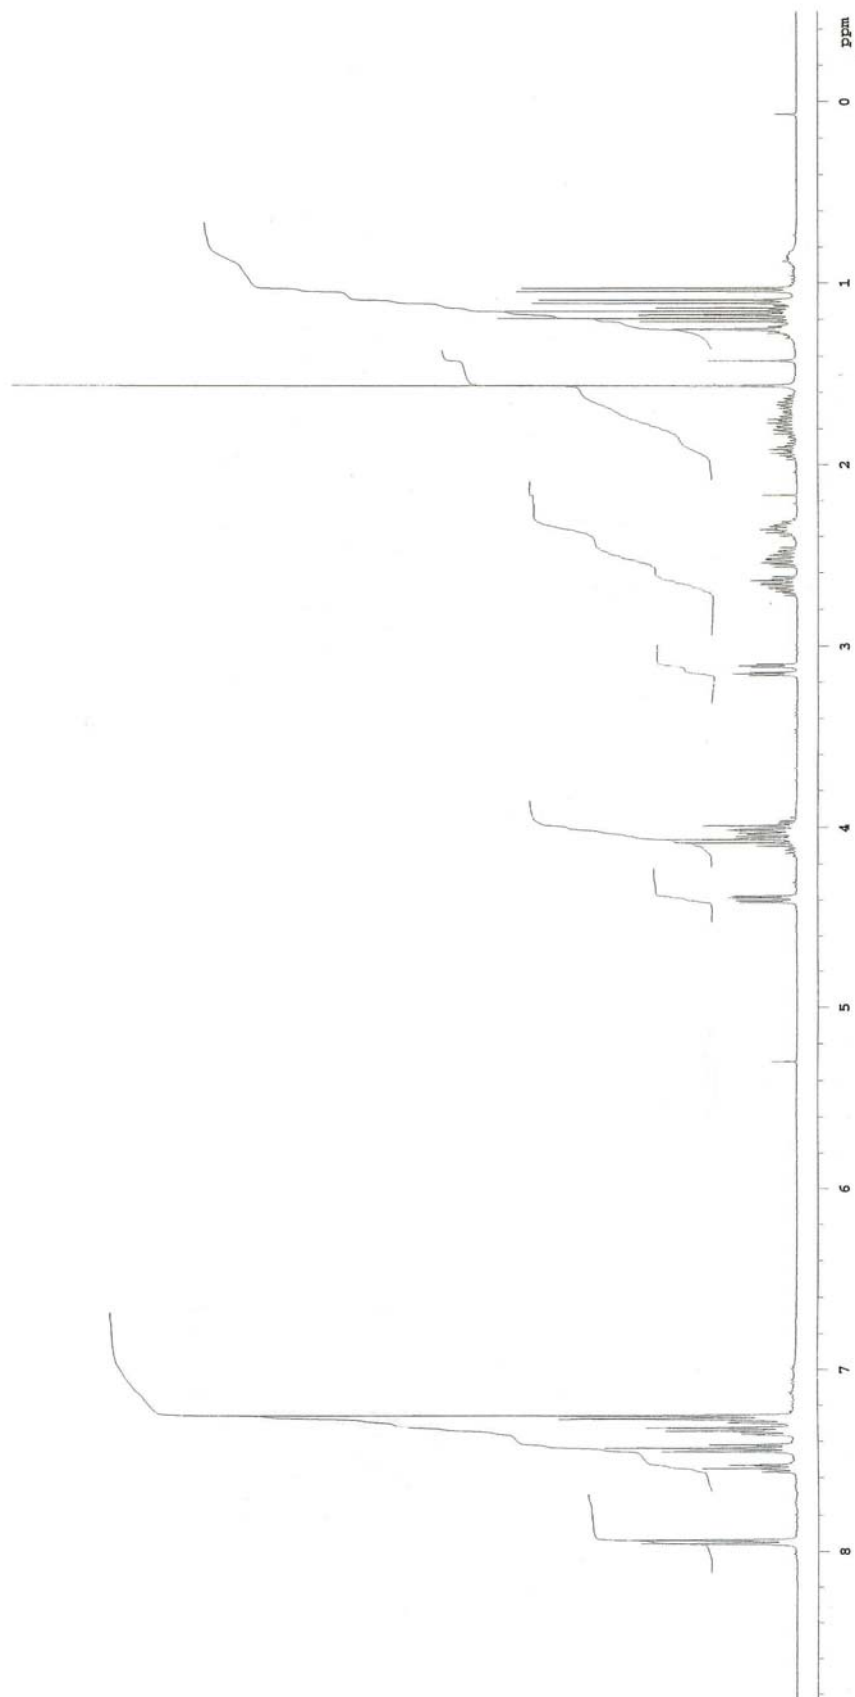



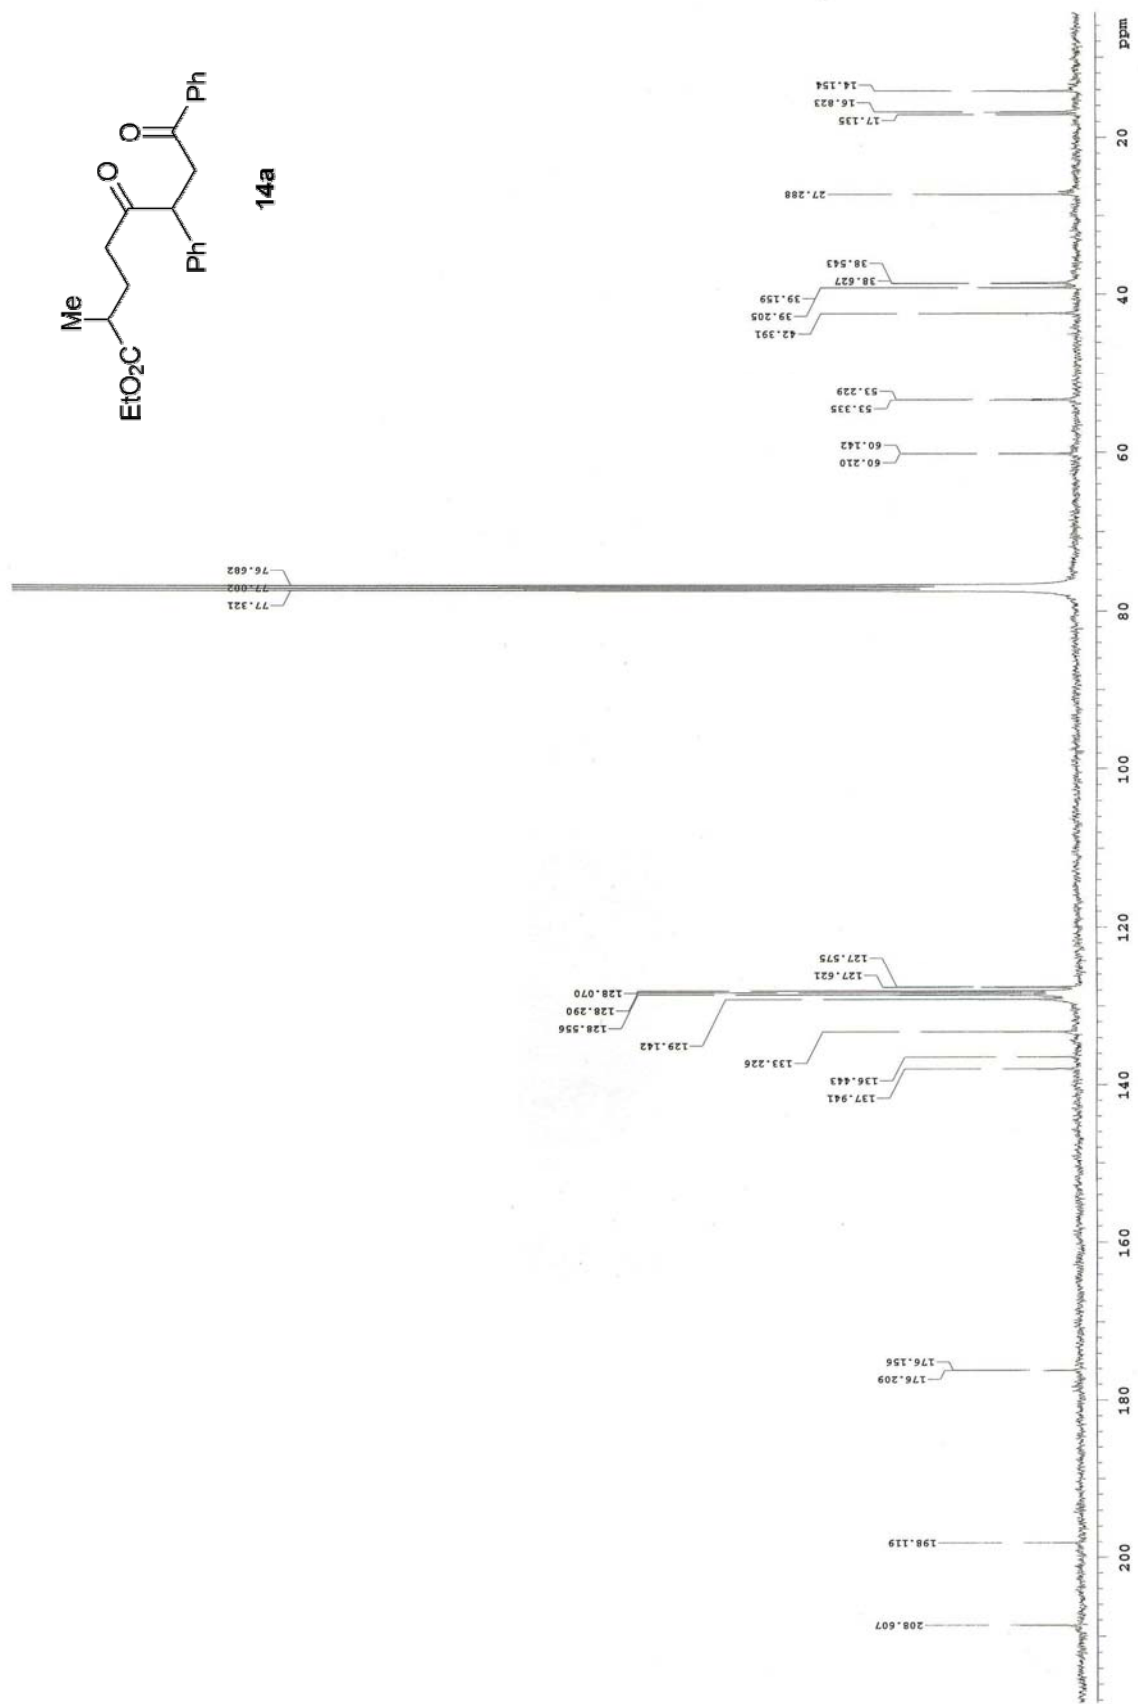

Supplement: c1ob06480k.pdf [file c1ob06480k.pdf]
